# Supplementary material for: Hand osteoarthritis in relation to mortality and incidence of cardiovascular disease: data from the Framingham Heart Study
Source: HighWire-hosted journal article supplement (doi:10.1136/annrheumdis-2013-203789), 2013-09-19
Supplement: annrheumdis-2013-203789supp.pdf [file annrheumdis-2013-203789supp.pdf]

**Online supplemental Table S1. Descriptive characteristics and associations to mortality and cardiovascular events in participants below 50 years and above 75 years of age who were excluded from the main analyses (n=1322 with assessment for hand OA and no rheumatic arthritis).**

|                                                                                                                                                         |                                          | <b>Below 50 years (n=617)</b> | <b>Above 75 years (n=705)</b> |
|---------------------------------------------------------------------------------------------------------------------------------------------------------|------------------------------------------|-------------------------------|-------------------------------|
| <b>Descriptive analyses:</b>                                                                                                                            |                                          |                               |                               |
|                                                                                                                                                         | Radiographic, n (%)                      | 18 (2.9%)                     | 495 (70.2%)                   |
|                                                                                                                                                         | Symptomatic hand OA, n (%)               | 9 (1.5%)                      | 159 (22.6%)                   |
| <i>Previous events (before examination cycle 22 in the Original cohort and examination cycle 5 in the Offspring cohort):</i>                            |                                          |                               |                               |
| -                                                                                                                                                       | Cardiovascular events, n (%)             | 5 (0.8%)                      | 138 (19.6%)                   |
| -                                                                                                                                                       | Coronary heart disease, n (%)            | 3 (0.5%)                      | 81 (11.5%)                    |
| -                                                                                                                                                       | Congestive heart failure, n (%)          | 2 (0.3%)                      | 44 (6.2%)                     |
| -                                                                                                                                                       | Atherothrombotic brain infarction, n (%) | 0 (0.0%)                      | 40 (5.7%)                     |
|                                                                                                                                                         | <i>Deaths, n (%)</i>                     | 33 (5.3%)                     | 653 (92.6%)                   |
| <i>New events (after examination cycle 22 in the Original cohort and examination cycle 5 in the Offspring cohort) in those without previous events:</i> |                                          |                               |                               |
| -                                                                                                                                                       | Cardiovascular events, n (%)             | 36/612 (5.9%)                 | 197/567 (34.7%)               |
| -                                                                                                                                                       | Coronary heart disease, n (%)            | 22/614 (3.6%)                 | 83/624 (13.3%)                |
| -                                                                                                                                                       | Congestive heart failure, n (%)          | 11/615 (1.8%)                 | 168/661 (25.4%)               |
| -                                                                                                                                                       | Atherothrombotic brain infarction, n (%) | 9/617 (1.5%)                  | 51/665 (7.2%)                 |
| <b>The hazard ratio (95% confidence interval) of mortality and cardiovascular events:</b>                                                               |                                          |                               |                               |
| <i>Mortality †</i>                                                                                                                                      | Radiographic hand OA                     | -                             | 0.86 (0.62-1.20); p=0.38      |
|                                                                                                                                                         | Symptomatic hand OA                      | -                             | 0.95 (0.66-1.38); p=0.79      |
| Cardiovascular events ‡                                                                                                                                 | Radiographic hand OA                     | 0.86 (0.11-6.75); p=0.89      | 0.59 (0.34-1.02); p=0.06      |
|                                                                                                                                                         | Symptomatic hand OA                      | 3.57 (0.79-16.1); p=0.10      | 0.90 (0.50-1.64); p=0.73      |
| Coronary heart disease ‡                                                                                                                                | Radiographic hand OA                     | 2.22 (0.28-17.6); p=0.45      | 0.92 (0.36-2.38); p=0.87      |
|                                                                                                                                                         | Symptomatic hand OA                      | 10.7 (2.10-54.6); p=0.004     | 1.10 (0.39-3.08); p=0.85      |

|                                     |                      |   |                          |
|-------------------------------------|----------------------|---|--------------------------|
| Congestive heart failure ‡          | Radiographic hand OA | - | 0.65 (0.37-1.16); p=0.15 |
|                                     | Symptomatic hand OA  | - | 0.89 (0.47-1.71); p=0.73 |
| Atherothrombotic brain infarction ‡ | Radiographic hand OA | - | 1.02 (0.23-4.41); p=0.98 |
|                                     | Symptomatic hand OA  | - | 1.96 (0.43-8.97); p=0.39 |

---

† adjusted for age, sex, cohort, BMI, total cholesterol:HDL ratio, current lipid-lowering treatment, increased blood pressure, current antihypertensive treatment, elevated fasting or non-fasting blood glucose, current antidiabetic treatment (oral or insulin), previous cardiovascular events (coronary heart disease, congestive heart failure, atherothrombotic stroke), previous cancer, current use of NSAIDs, daily use of aspirin, current/previous smoking, alcohol use. Participants without hand OA serving as reference;

‡ adjusted for age, sex, cohort, BMI, total cholesterol:HDL ratio, current lipid-lowering treatment, increased blood pressure, current antihypertensive treatment, elevated fasting or non-fasting blood glucose, current antidiabetic treatment (oral or insulin), current use of NSAIDs, daily use of aspirin, current/previous smoking, alcohol use. Participants without hand OA serving as reference; – too few events to analyze.
